# Supplementary material
Source: publisher site journal article supplement (https://www.degruyterbrill.com/publication/isbn/9783110339482/downloadAsset/9783110339482_Inhaltsverzeichnis.pdf)
Supplement: Supplementary file 1 [file 9783110339482_Inhaltsverzeichnis.pdf]

# Inhalt

## Vorwort und Danksagung — VII

## Teil I: Problemstellung und Hinführung

- 1 Eine andere Linguistik? — 3**
  - 1.1 Einsätze einer semiologischen Linguistik — **10**
    - 1.1.1 „Sprache“ als Gegenstand — **11**
    - 1.1.2 *fait social* und Kollektivbewusstsein — **17**
    - 1.1.3 Ausgrenzung der Sprach-Medialität — **22**
  - 1.2 Von der ‚Identität‘ zur ‚Alterität‘ — **28**
  - 1.3 Linguistik nach der Semiologie — **32**
- 2 Medientheoretische Orientierung — 36**
  - 2.1 ‚Vermittlung‘ als Grundbegriff — **37**
    - 2.1.1 Von der Darstellung zur Vermittlung — **39**
    - 2.1.2 Intersubjektivität und Gemeinschaft — **44**
    - 2.1.3 Mittel und Sinnvermittlung — **47**
    - 2.1.4 Medientechnik und kulturelle Praxis — **51**
    - 2.1.5 Materialität und Wahrnehmung — **54**
  - 2.2 Dimensionen von Medialität — **58**

## Teil II: Kritische Sichtungen der Linguistik

- 3 Linguistische Konzeptionen von Verständigung — 63**
  - 3.1 Verständigung als Verhaltenssystem — **64**
  - 3.2 Verständigung als Regelsystem — **68**
    - 3.2.1 Starker Konventionalismus — **72**
    - 3.2.2 Mittelbegriff von Sprache — **76**
    - 3.2.3 Norm und Relevanz — **79**
    - 3.2.4 Ontologisierung der Regel — **84**
  - 3.3 Verständigung als interaktive Sinnkonstitution — **89**
    - 3.3.1 Identität von Meinen und Verstehen — **90**
    - 3.3.2 Primat der Objektivierung — **96**
    - 3.3.3 Soziale Differenzen und kulturelle Alterität — **100**
  - 3.4 Grundprobleme linguistischer Verständigungs-konzeptionen — **105**

**4 Linguistische Konzeptionen von Medialität — 110**

- 4.1 Medien: Technik vs. Zeichen — 111
- 4.2 Die Frage nach der Zeichen-Materialität — 113
- 4.3 Die Frage nach der Schrift — 117
  - 4.3.1 Primat der konzeptionellen Schrift — 119
  - 4.3.2 Das phonographische Dogma — 122
  - 4.3.3 Transparenz des Geschriebenen — 126
  - 4.3.4 Schrift als reine Anschauungsform — 131
  - 4.3.5 Semiologie als kulturelle Semantik — 134
- 4.4 Chiasma von Schrift und Gespräch — 137

**Teil III: Medientheoretische Begründung**

**5 Einsätze der Medienphilosophie Derridas — 145**

- 5.1 Hieroglyphische Grammatologie — 153
  - 5.1.1 Absetzung von der dialektischen Vermittlung — 161
  - 5.1.2 Anschluss an die Phänomenologie — 167
  - 5.1.3 Unterscheidung von Ausdruck und Anzeige — 177
  - 5.1.4 Die Voraussetzung des Anderen — 185
- 5.2 Dekonstruktion als praktische Reflexion — 192
  - 5.2.1 Medienkritik — 192
  - 5.2.2 Indirektheit und rhetorische Strategie — 203
  - 5.2.3 Auf die Probe einer Lektüre — 208
  - 5.2.4 Metapher und Figur — 215
  - 5.2.5 Zurück zur Oberfläche des Textes — 220

**6 Medientheorie der Verständigung — 225**

- 6.1 Sprachtheorie *nach* Saussure — 230
  - 6.1.1 Transzendente Ordnung und erste Bedeutung — 233
  - 6.1.2 Saussures *langue* und Derridas Kritik — 239
  - 6.1.3 Entwicklung eines allgemeinen Medien-Begriffs — 242
- 6.2 Grundlagen von Verständigung und Sinnkonstitution — 246
  - 6.2.1 Sedimentierte Spuren, ästhetische Ordnung — 247
  - 6.2.2 Wahrnehmung und Form-Werdung — 257
  - 6.2.3 Welthaltigkeit und ästhetischer Überschuss — 268
  - 6.2.4 Pluralität und Dynamik der Sinnvollzüge — 273
  - 6.2.5 Verständigung als Über-Setzung — 277
- 6.3 Möglichkeiten und Grenzen der Verständigung — 285
  - 6.3.1 Iterabilität und Alterität — 287

|          |                                        |            |
|----------|----------------------------------------|------------|
| 6.3.2    | Idiomatizität —                        | <b>292</b> |
| 6.3.3    | Intentionalität —                      | <b>297</b> |
| 6.3.4    | Eigenes und fremdes Sprechen —         | <b>307</b> |
| 6.4      | Medialität der Verständigung —         | <b>316</b> |
| <b>7</b> | <b>Medialität von Kultur —</b>         | <b>320</b> |
| 7.1      | Der Bezug auf den Anderen —            | <b>322</b> |
| 7.1.1    | Medium meint nicht Mittel —            | <b>325</b> |
| 7.1.2    | Mediale Erfahrung —                    | <b>330</b> |
| 7.1.3    | Beziehung zu Anderen —                 | <b>341</b> |
| 7.1.4    | Erfahrungen von Fremdheit —            | <b>350</b> |
| 7.1.5    | Pluralität und Inter-Kulturalität —    | <b>358</b> |
| 7.1.6    | Dezentrierte Kultur und Identität —    | <b>366</b> |
| 7.2      | Kulturelle Umwelt und Gedächtnis —     | <b>372</b> |
| 7.2.1    | Heterotopologische Ordnung —           | <b>374</b> |
| 7.2.2    | Agentivität und liminale Erfahrungen — | <b>384</b> |
| 7.2.3    | Transgenerationale Vermittlung —       | <b>397</b> |
| 7.2.4    | Grenzen der Überlieferung —            | <b>403</b> |
| 7.3      | Medialität —                           | <b>411</b> |
| 7.3.1    | Differenz als Un-Möglichkeit —         | <b>414</b> |
| 7.3.2    | Kulturelle Identität —                 | <b>419</b> |

#### **Teil IV: Programmatischer Ausblick**

|          |                                        |            |
|----------|----------------------------------------|------------|
| <b>8</b> | <b>Linguistische Kulturforschung —</b> | <b>429</b> |
| 8.1      | Thematische Felder —                   | <b>433</b> |
| 8.2      | Methodische Perspektiven —             | <b>439</b> |
| 8.3      | Linguistik als kulturelle Praxis —     | <b>445</b> |

#### **Literaturverzeichnis — 447**

#### **Index — 476**
